# Supplementary material for: Retrotransposons in Werner syndrome-derived macrophages trigger type I interferon-dependent inflammation in an atherosclerosis model
Source: PubMed Central journal article supplement (PMC11164933; doi:10.1038/s41467-024-48663-w), 2024-06-10
Supplement: 41467_2024_48663_MOESM3_ESM.pdf [file 41467_2024_48663_MOESM3_ESM.pdf]

## **Description of Additional Supplementary Files**

**Supplementary Data 1.** Results of GSEA analysis. Each tab contains a different pair-wise gene set enrichment analysis (GSEA). Normalized enrichment score (NES) and false direct recovery (FDR) qvalues were obtained from GSEA software.

**Supplementary Data 2.** Oligonucleotide sequences for RT-qPCR. All the oligonucleotide primers used in this study were listed.
